# Supplementary material for: Binding interaction of an anionic amino acid surfactant with bovine serum albumin: physicochemical and spectroscopic investigations combined with molecular docking study
Source: Royal Society of Chemistry journal article supplement (doi:10.1039/c5ra17254c), 2015-01-01
Supplement: c5ra17254c1.pdf [file c5ra17254c1.pdf]

**Supporting information**

**Binding Interaction of an Anionic Amino Acid Surfactant with Bovine Serum  
Albumin: Physicochemical and Spectroscopic Investigations combined with  
Molecular Docking Study**

Somnath Dasmandal, Arjama Kundu, Suparna Rudra, and Ambikesh Mahapatra\*

*Department of Chemistry, Jadavpur University, Kolkata 700 032, India*

\*Corresponding author. Tel.: +9133 2457 2770 (office), +9133 2432 4586 (residence); fax:  
+9133 2414 6223.

E-mail addresses [amahapatra@chemistry.jdvu.ac.in](mailto:amahapatra@chemistry.jdvu.ac.in), [ambikeshju@gmail.com](mailto:ambikeshju@gmail.com)

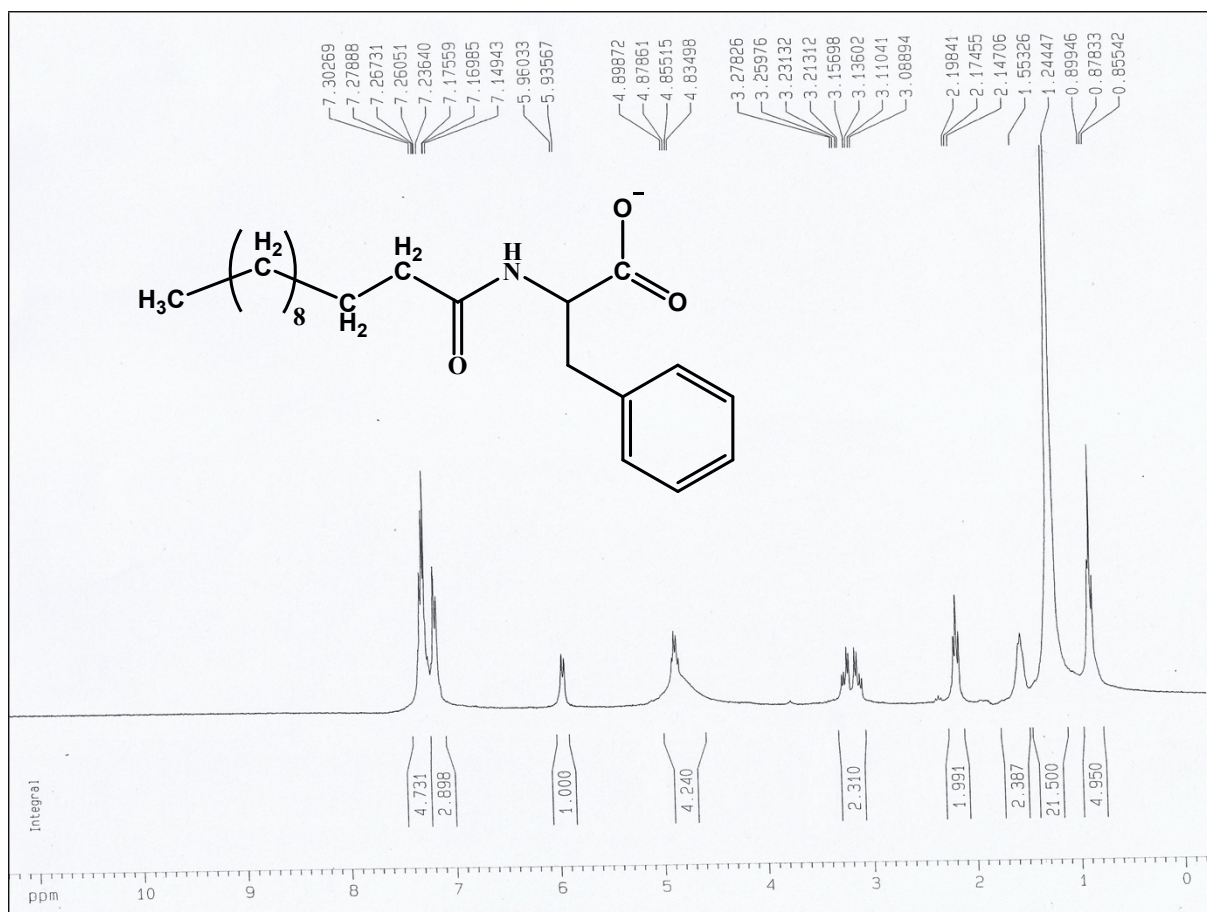

Fig. S1:  $^1\text{H}$  NMR spectra of *N*-dodecanoyl-L-phenylalanine.

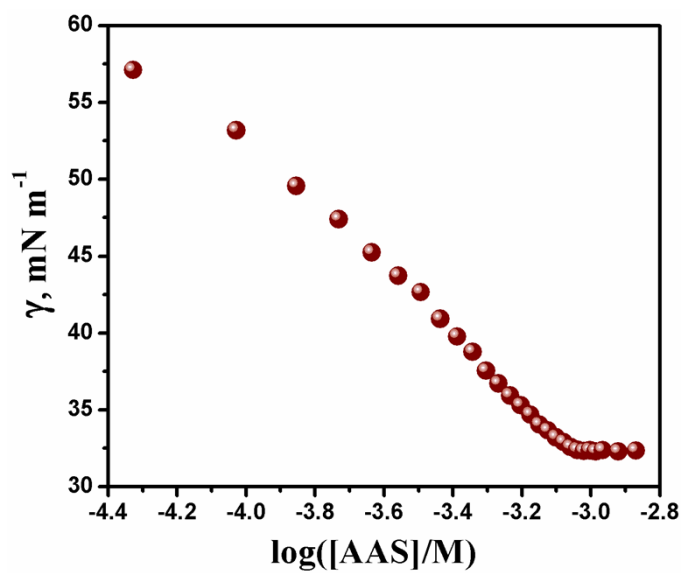

Fig. S2: Variation of surface tension of AAS in pure water at 298 K.

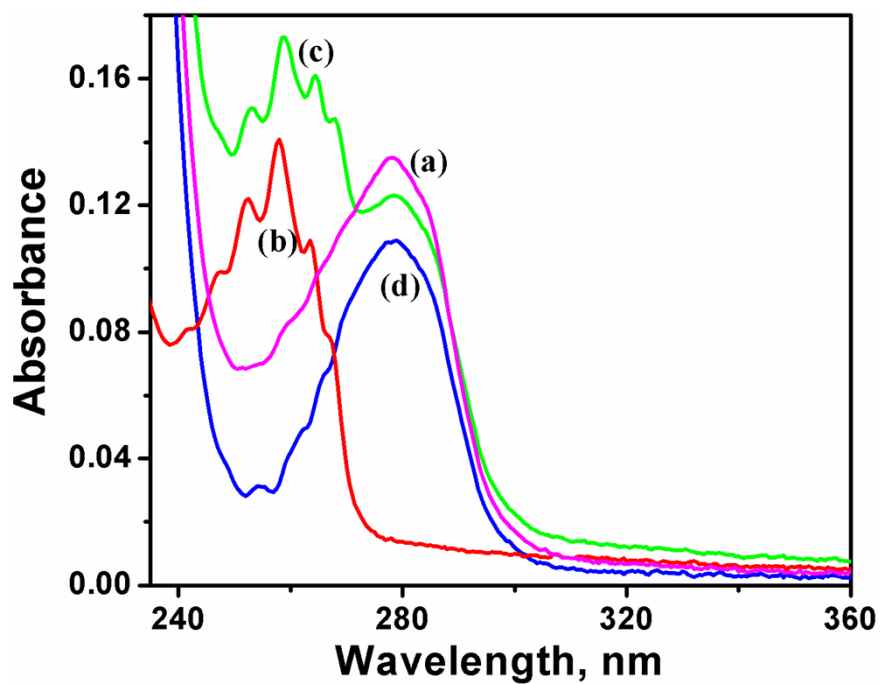

Fig. S3: (a) absorption spectrum of BSA only, (b) absorption spectrum of AAS only, (c) absorption spectrum of BSA-AAS system at the same concentration of AAS and (d) difference of absorption spectrum between BSA-AAS system and AAS at 298 K; [BSA] = 3.0  $\mu$ M, [AAS] = 2.0 mM.

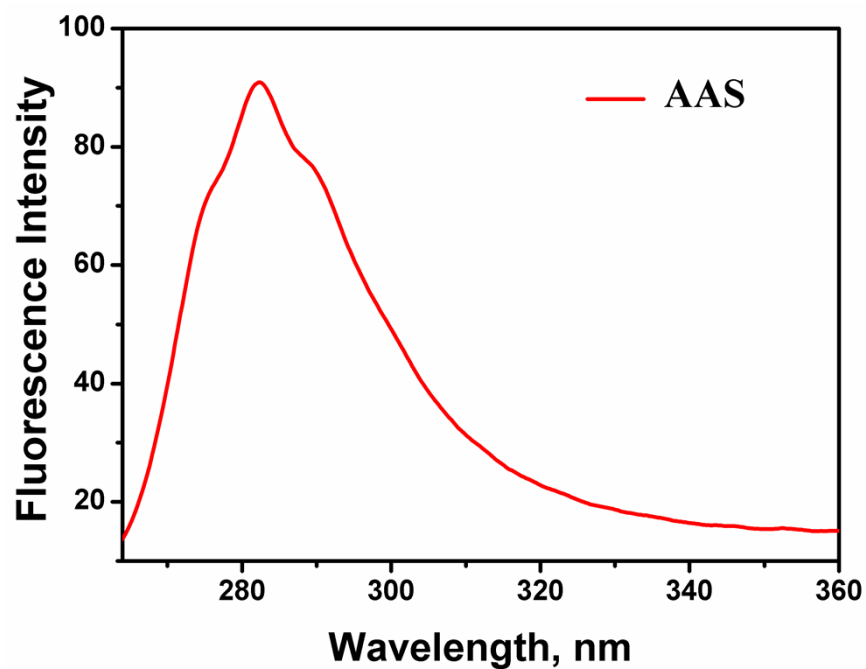

Fig. S4: Emission spectrum of AAS,  $\lambda_{\text{ex}} = 258$  and  $\lambda_{\text{em}} = 282$  nm, [AAS] = 2.0 mM, at 298 K.

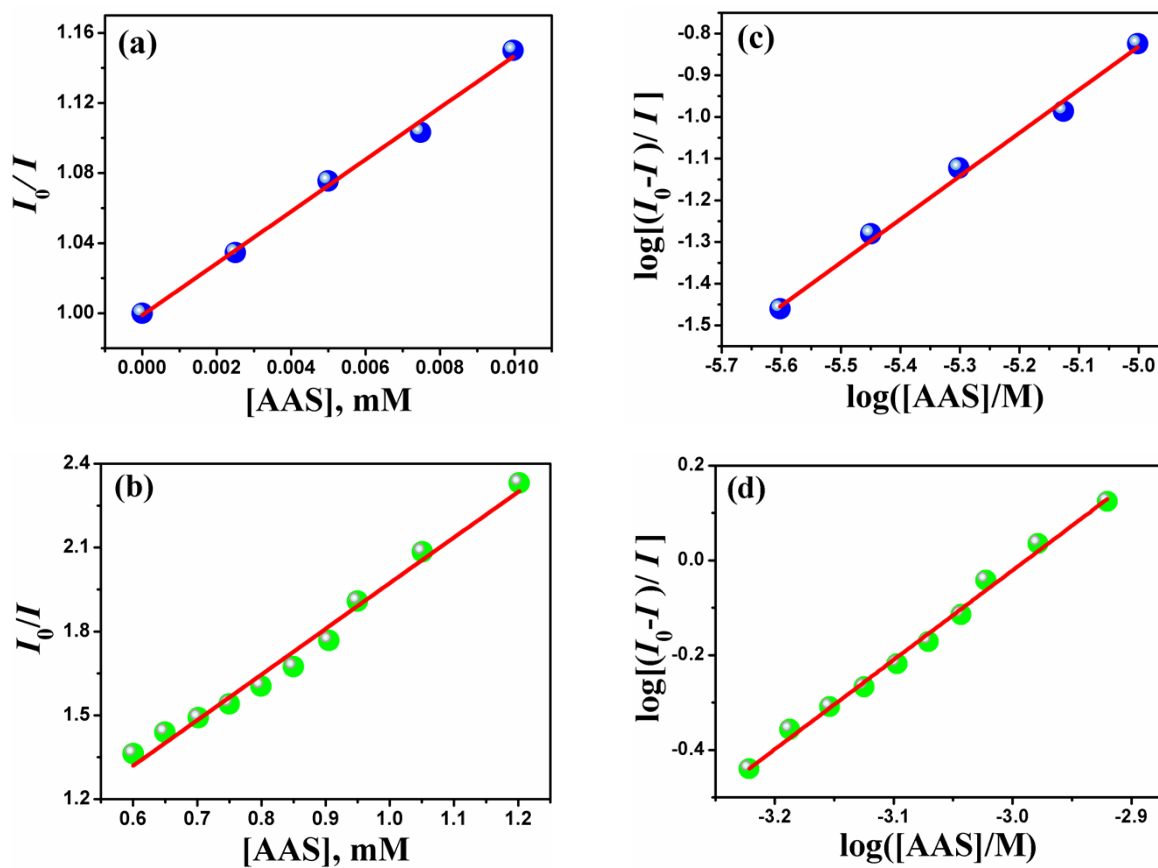

Fig. S5: (a) and (b) are Stern-Volmer plot of region I and III respectively; (c) and (d) are modified Stern-Volmer plot of region I and III respectively at 298 K, [BSA] = 3.0  $\mu$ M

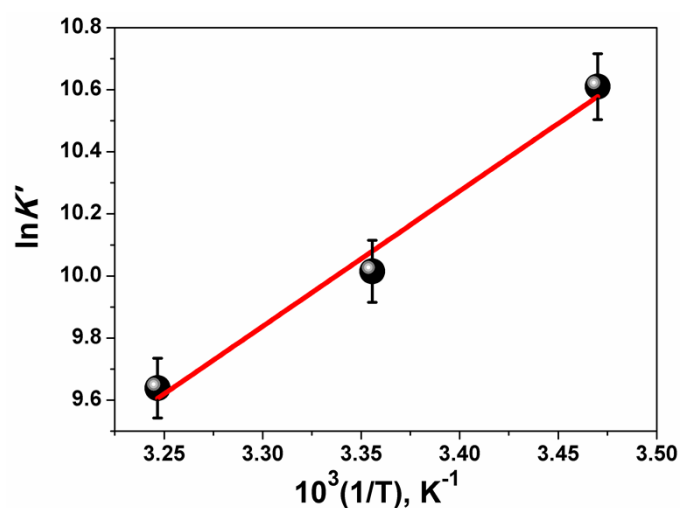

Fig S6: Van't-Hoff plot for region I of BSA-AAS system, [BSA] = 3.0  $\mu$ M.

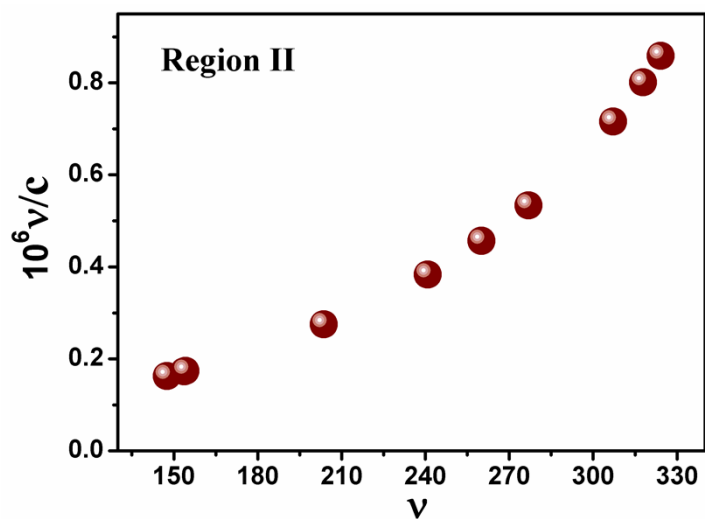

Fig. S7: Scatchard plot for region II of BSA-AAS system at 298 K, [BSA] = 3.0  $\mu\text{M}$ .

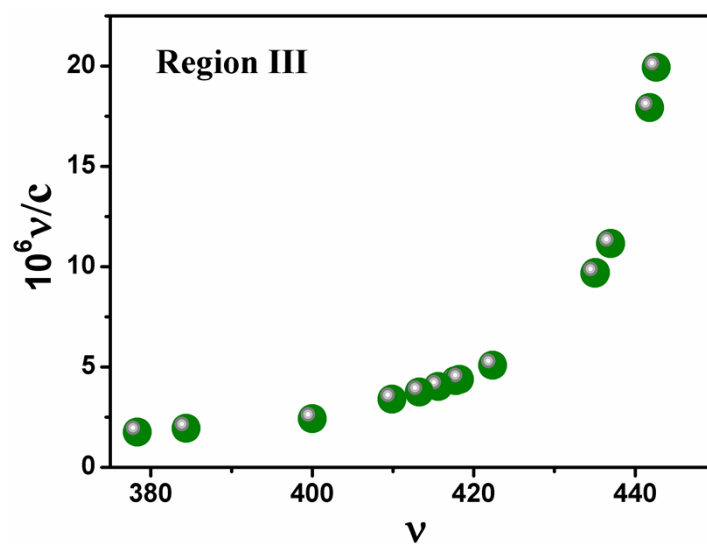

Fig. S8: Scatchard plot for region III of BSA-AAS system at 298 K, [BSA] = 3.0  $\mu\text{M}$ .

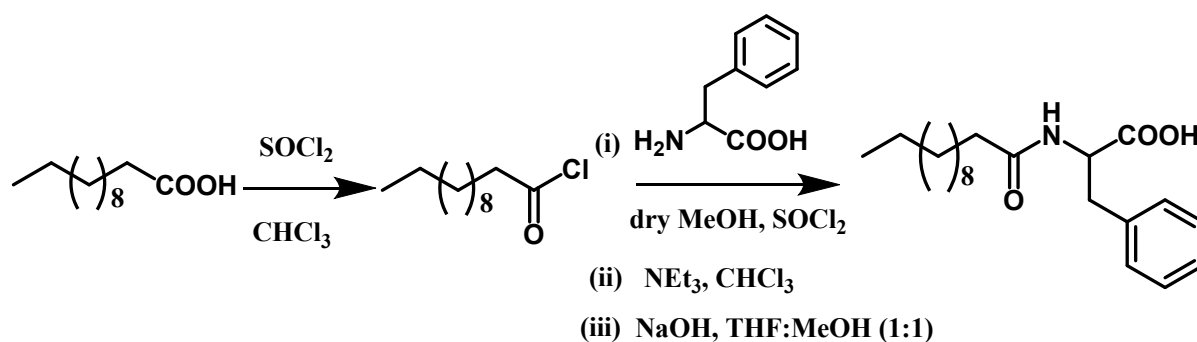

**Scheme S1:** Synthetic route of N-dodecanolphenylalanine

**Table S1:** Stern-Volmer quenching constant and modified Stern-Volmer association constant for the first three regions of BSA-AAS system at 298 K.

| Region | $10^3 K_{\text{SV}}$ ,<br>$\text{M}^{-1}$ | $K_{\text{a}}$ ,<br>$\text{M}^{-\text{n}}$ | $R^{\text{a}}$ | $\Delta G$ , $\text{kJ mol}^{-1}$ |
|--------|-------------------------------------------|--------------------------------------------|----------------|-----------------------------------|
| I      | $14.8 \pm 0.05$                           | $2.23 \times 10^4$                         | 0.9921         | $-24.81 \pm 1.61$                 |
| II     | $0.31 \pm 0.02$                           | 1.34                                       | 0.9758         | $-0.73 \pm 0.11$                  |
| III    | $1.63 \pm 0.07$                           | $4.39 \times 10^5$                         | 0.9933         | $-32.19 \pm 0.93$                 |

<sup>a</sup>  $R$  is correlation coefficient for the  $K_{\text{a}}$  values

**Table S2:** Stern-Volmer quenching constant, modified Stern-Volmer association constant and thermodynamic parameters at different temperatures for region I of BSA-AAS system

| Temperature, K | $10^4 K_{SV}$ ,<br>M <sup>-1</sup> | $10^4 K_a$ ,<br>M <sup>-n</sup> | $R^a$  | $\Delta H^\circ$ ,<br>kJ mol <sup>-1</sup> | $\Delta S^\circ$ ,<br>J mol <sup>-1</sup> K <sup>-1</sup> | $\Delta G^\circ$ , kJ mol <sup>-1</sup> |
|----------------|------------------------------------|---------------------------------|--------|--------------------------------------------|-----------------------------------------------------------|-----------------------------------------|
| 288            | $1.89 \pm 0.1$                     | 4.05                            | 0.9855 |                                            |                                                           | $-25.40 \pm 2.16$                       |
| 298            | $1.48 \pm 0.05$                    | 2.23                            | 0.9921 | $-36.21 \pm 4.19$                          | $-37.69 \pm 1.41$                                         | $-24.81 \pm 1.61$                       |
| 308            | $1.33 \pm 0.03$                    | 1.54                            | 0.9977 |                                            |                                                           | $-24.68 \pm 0.86$                       |

<sup>a</sup>  $R$  is correlation coefficient for the  $K_a$  values

**Table S3:** Secondary structural content of BSA in the absence and presence of AAS at 298 K.

| [AAS]/[BSA] | % $\alpha$ -helix | % $\beta$ -sheets | % $\beta$ -turn | % Random coil |
|-------------|-------------------|-------------------|-----------------|---------------|
| 0           | 64.2              | 7.2               | 12.3            | 17.2          |
| 10          | 59.9              | 8.1               | 12.8            | 19.1          |
| 20          | 58.2              | 8.4               | 13.1            | 19.8          |
| 50          | 54.8              | 9.3               | 13.5            | 21.3          |
| 100         | 50.6              | 10.6              | 14.2            | 23.6          |
| 200         | 38.5              | 14.4              | 16.3            | 29.8          |
